# Supplementary material for: Determinants of behavioural and biological risk factors for cardiovascular diseases from state level STEPS survey (2017–19) in Madhya Pradesh
Source: PeerJ. 2020 Dec 10;8:e10476. doi: 10.7717/peerj.10476 (PMC7733649; doi:10.7717/peerj.10476)
Supplement: Supplemental Information 2 — Odds ration along with their 95% confidence interval for behavioural and biological determinants of CVDs [file peerj-08-10476-s002.xlsx]

## Sheet: Suppl Table
Variable	Tobacco Users (Current oral or smokers i.e. in last 30 days)	Smokers (Current smokers i.e. in last 30 days)	Alcohol Users (Drank alcohol in past 30 days)	Physical Inactivity (<150 min of moderate-intensity activity per week, or equivalent)	Diet (Ate less than 5 servings of fruit and/or vegetables on average per day)	BMI Overweight (BMI >= 25 kg/m2)	Raised BP (SBP>140 or DBP>140 or taking antihypertensives)	Raised Blood Glucose (RBS>200 or taking drugs for diabetes)	Raised Cholesterol (Total cholesterol> 190 mg/dl or on drug for cholesterol)
	Odds Ratio (95% CI)	Odds Ratio (95% CI)	Odds Ratio (95% CI)	Odds Ratio (95% CI)	Odds Ratio (95% CI)	Odds Ratio (95% CI)	Odds Ratio (95% CI)	Odds Ratio (95% CI)	Odds Ratio (95% CI)
Age Group
18-29	Ref.	Ref.	Ref.	Ref.	Ref.	Ref.	Ref.	Ref.	Ref.
30-44	1.533 (1.240-1.897)	2.065 (1.339-3.186)	0.909 (0.464-1.781)	0.835 (0.663-1.052)	0.995 (0.531-1.865)	3.474 (2.529-4.773)	2.639 (2.032-3.428)	1.460 (0.945 - 2.256)	1.297 (0.803 - 2.094)
44-59	1.874 (1.448-2.426)	2.691 (1.715-4.223)	2.352 (1.254-4.412)	0.910 (0.703-1.177)	1.340 (0.597-3.009)	4.179 (3.045-5.735)	6.993 (5.262-9.293)	2.542 (1.511 - 4.279)	2.542 (1.664 - 3.883)
59-69	1.991 (1.491-2.658)	2.353 (1.526-3.628)	2.781 (1.396-5.540)	1.742 (1.299-2.338)	1.378 (0.616-3.085)	3.073 (2.114-4.467)	13.393 (9.787-18.327)	2.966 (1.724 - 5.103)	4.392 (2.619 - 7.365)
Gender
Men	8.846 (6.985-11.203)	59.845 (35.516-100.839)	53.745 (28.439-101.570)	1.822 (1.430-2.321)	1.007 (0.616-1.645)	Ref.	1.18 (0.968-1.439)	1.714 (1.273-2.308)	Ref.
Women	Ref.	Ref.	Ref.	Ref.	Ref.	1.881 (1.493-2.37)	Ref.	Ref.	1.726 (1.262 - 2.361)
Education
Not formally Educated	1.407 (1.087-1.822)	2.898 (1.985-4.230)	1.687 (1.143 -2.490)	1.206 (0.936-1.555)	1.717 (0.783-3.768)	Ref.	Ref.	Ref.	Ref.
Primary	1.566 (1.223-2.006)	1.936 (1.376-2.723)	1.815 (1.169-2.817)	0.870 (0.668-1.134)	1.258 (0.654-2.419)	1.27 (0.937-1.723)	1.016 (0.817-1.265)	0.936 (0.599 - 1.463)	0.862 (0.545-1.365)
Secondary	1.324 (1.012-17.33)	1.517 (1.055-2.181)	1.117 (0.724-1.722)	0.888 (0.685-1.151)	1.288 (0.640-2.592)	1.531 (1.114-2.105)	0.96 (0.731-1.261)	0.705 (0.440 - 1.132)	1.223 (0.796- 1.878)
Higher Secondary and Above	Ref.	Ref.	Ref.	Ref.	Ref.	1.607 (1.287-2.007)	1.157 (0.947-1.414)	0.836 (0.532 - 1.313)	0.972 (0.644-1.468)
Caste Group
General	Ref.	Ref.	Ref.	Ref.	Ref.	Ref.	Ref.	Ref.	Ref.
OBC	1.558 (1.260-1.925)	0.603 (0.380-0.957)	2.036 (1.130-3.669)	0.737 (0.501-1.084)	1.202 (0.633-2.282)	0.496 (0.370 - 0.665)	0.743 (0.549 - 1.005)	0.895 (0.562 - 1.426)	0.642 (0.368 - 1.121)
SC	1.755 (1.379-2.233)	1.069 (0.690-1.658)	1.717 (0.895-3.293)	0.748 (0.466-1.202)	1.311 (0.486-3.533)	0.436 (0.316 - 0.602)	0.740 (0.512 - 1.069)	0.612 (0.308 - 1.217)	0.734 (0.424 - 1.270)
ST	2.130 (1.528-2.968)	0.885 (0.521-1.501)	1.441 (0.696-2.983)	0.316 (0.184-0.544)	2.783 (1.069-7.248)	0.256 (0.176 - 0.372)	0.780 (0.539 - 1.127)	1.063 (0.625 - 1.807)	0.677 (0.337 - 1.359)
Marital Status
Never Married	Ref.	Ref.	Ref.	Ref.	Ref.	Ref.	Ref.	Ref.	Ref.
Currently Married	2.044 (1.476-2.830)	4.314 (2.300-8.090)	3.249 (1.381-7.642)	0.560 (0.404-0.775)	0.951 (0.354-2.560)	1.515 (0.843-2.724)	0.786 (0.522-1.184)	2.909 (1.192-7.099)	2.089 (0.799 - 5.462)
Divorced or Seperated or Widowed	3.062 (2.011-4.661)	4.550 (1.991-10.401)	3.987 (1.467-10.837)	0.766 (0.518-1.133)	0.871 (0.214-3.545)	1.474 (0.787-2.76)	0.989 (0.595-1.642)	2.995 (1.066-8.413)	1.008 (0.366 - 2.774)
Locality
Rural	Ref.	Ref.	Ref.	Ref.	Ref.	Ref.	Ref.	Ref.	Ref.
Urban	1.189 (0.914-1.548)	1.167 (0.758-1.799)	0.562 (0.327-0.965)	0.653 (0.460-0.926)	2.005 (1.051-3.825)	2.408 (1.737-3.339)	1.35 (1.087-1.675)	1.358 (0.933-1.976)	0.662 (0.408 - 1.074)
